# Supplementary material for: iCLIP Predicts the Dual Splicing Effects of TIA-RNA Interactions
Source: PLOS journal article supplement (doi:10.1371/journal.pbio.1000530), 2010-10-26
Supplement: S11 (10.1371/journal.pbio.1000530.s011) [file journal.pbio.1000530.s011]

Table S2. Mapping Information for iCLIP and iCLAP data.

|                                       | iCLIP       |             |             |             |             |             | iCLAP   |         |             |             |
|---------------------------------------|-------------|-------------|-------------|-------------|-------------|-------------|---------|---------|-------------|-------------|
|                                       | TIA1        |             |             | TIAL1       |             |             | TIA1    | TIAL1   | Control     |             |
|                                       | Replicate 1 | Replicate 2 | Replicate 3 | Replicate 1 | Replicate 2 | Replicate 3 |         |         | Replicate 1 | Replicate 2 |
| Sequence reads matching barcode       | 1806192     | 1983312     | 2223993     | 4613203     | 4277738     | 3513826     | 2015615 | 1497290 | 26327       | 477853      |
| Reads mapping to the genome           | 1416999     | 1397167     | 1469242     | 3501422     | 3198249     | 2560482     | 791433  | 394465  | 14252       | 85264       |
| Reads after random barcode evaluation | 229928      | 271083      | 368771      | 1255331     | 693096      | 1018374     | 14546   | 2528    | 1074        | 7798        |
| Crosslinking nucleotides              | 223785      | 263926      | 351833      | 1207770     | 665624      | 985399      | 14460   | 2507    | 1059        | 7144        |
| Total                                 |             | 803354      |             |             | 2650190     |             | 14460   | 2507    | 8203        |             |
